# Supplementary material for: l-Phenylalaninel-phenylalaninium bromide – a new nonlinear optical material
Source: Royal Society of Chemistry journal article supplement (doi:10.1039/c4ce00718b), 2014-07-01
Supplement: c4ce00718b1.pdf [file c4ce00718b1.pdf]

**Figure 1.** FTIR spectrum of LPLPB

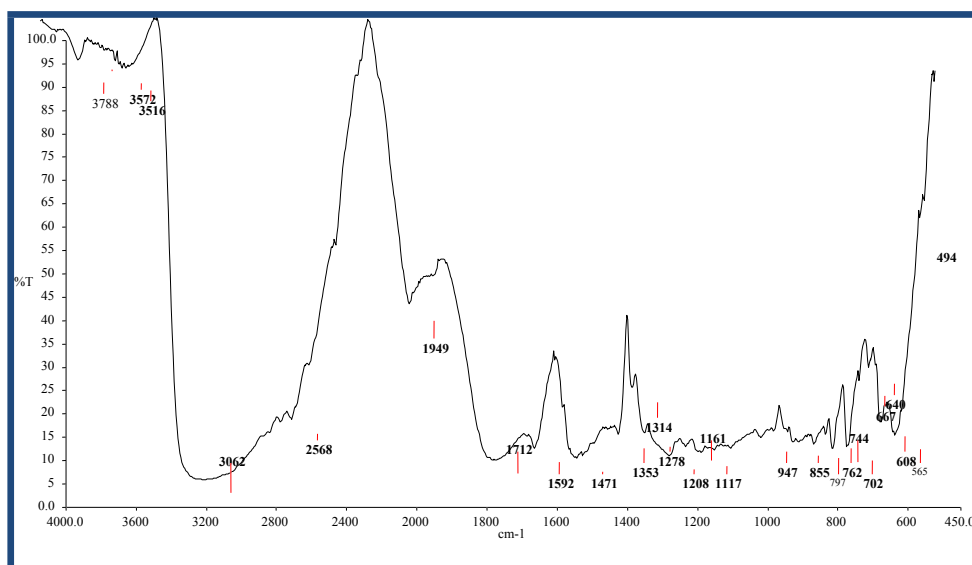

**Table 1. FT-IR functional group assignments of LPLPB**

| <b>Wavenumber(cm<sup>-1</sup>)</b> | <b>Assignments</b>                                                     |
|------------------------------------|------------------------------------------------------------------------|
| 494                                | N-C-N Asymmetric bending                                               |
| 608                                | Bending O-C-O                                                          |
| 640                                | vibration of P-O-P in chain                                            |
| 667                                | C-C in plane deformation band                                          |
| 702                                | phenyl ring out of plane ring deformation                              |
| 740                                | phenyl ring out of plane CH deformation                                |
| 855                                | C-C stretching                                                         |
| 947                                | NH <sub>3</sub> <sup>+</sup> rocking vibration                         |
| 1117                               | NH <sub>3</sub> <sup>+</sup> symmetric deformation                     |
| 1161                               | NH <sub>3</sub> <sup>+</sup> rocking                                   |
| 1208                               | phenyl ring - carbon stretching                                        |
| 1314                               | C-N stretching vibration                                               |
| 1353                               | C - H deformation (chain)                                              |
| 1471                               | asymmetric CH <sub>3</sub> <sup>+</sup> bending                        |
| 1592                               | NH <sub>3</sub> <sup>+</sup> Bending                                   |
| 1712                               | C = O stretching                                                       |
| 1949                               | C=C stretching                                                         |
| 2568                               | NH <sub>3</sub> <sup>+</sup> absorption bands at 2844 cm <sup>-1</sup> |
| 3062                               | NH <sub>3</sub> <sup>+</sup> symmetric stretching                      |
| 3572                               | Sharp OH Stretching band                                               |
